# Supplementary material for: Composition and size tailored synthesis of iron selenide nanoflakes
Source: Royal Society of Chemistry journal article supplement (doi:10.1039/c005097k), 2010-01-01
Supplement: c005097k.pdf [file c005097k.pdf]

## Supporting Information

# Composition and Size Tailored Synthesis of Iron Selenide Nanoflakes

Liqiao Chen,<sup>a,b</sup> Hongquan Zhan,<sup>a</sup> Xianfeng Yang,<sup>a</sup> Zhaoyong Sun,<sup>b</sup> Jun Zhang,<sup>b</sup> Dan Xu,<sup>b</sup> Chaolun Liang,<sup>a</sup> Mingmei Wu<sup>\*a</sup> and Jiye Fang<sup>\*b</sup>

*<sup>a</sup>MOE Key Laboratory of Bioinorganic and Synthetic Chemistry / State Key Laboratory of Optoelectronic Materials and Technology, School of Chemistry and Chemical Engineering, Instrumental Analysis and Research Centre, Sun Yat-Sen (Zhongshan) University, Guangzhou, 510275 (P. R. China). Fax: 86-20-84111038; Tel: 86-20-84111823; E-mail: ceswmm@mail.sysu.edu.cn*

*<sup>b</sup>Department of Chemistry, State University of New York at Binghamton, Binghamton, New York 13902 (U.S.A). Fax: 1-607- 7774478; Tel: 1-607 7773752. E-mail: jfang@binghamton.edu*

\* To whom correspondence should be addressed.

E-mail: ceswmm@mail.sysu.edu.cn

E-mail: jfang@binghamton.edu

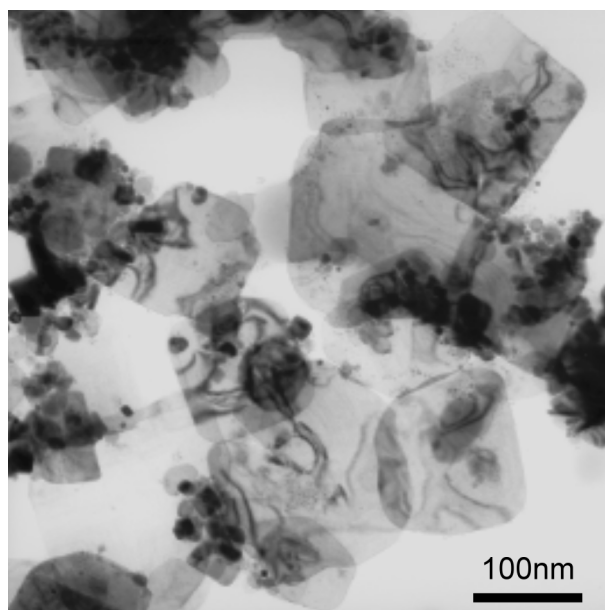

**Figure S1.** TEM image of the sample grown from the typical feedstock (Fig. 2) but without any presence of oleic acid.

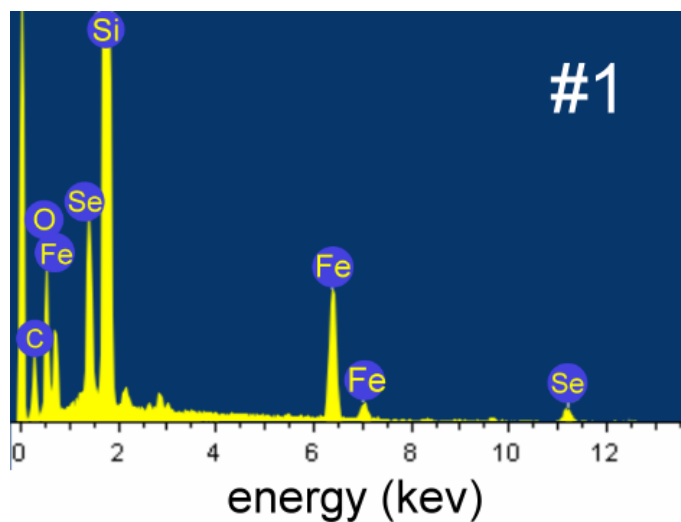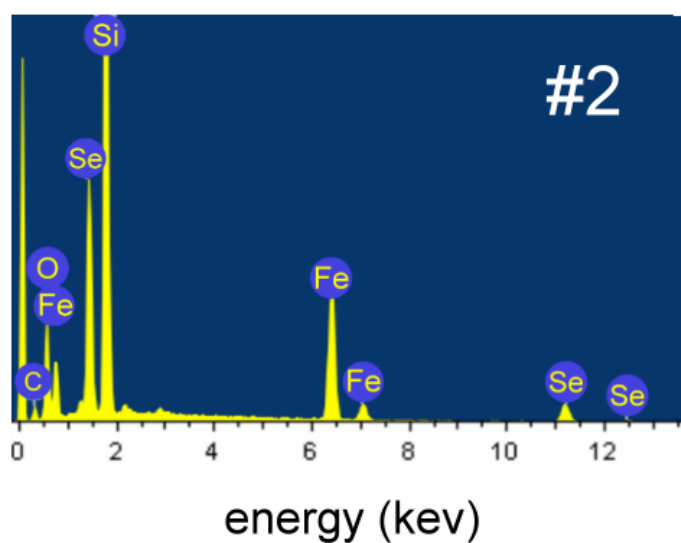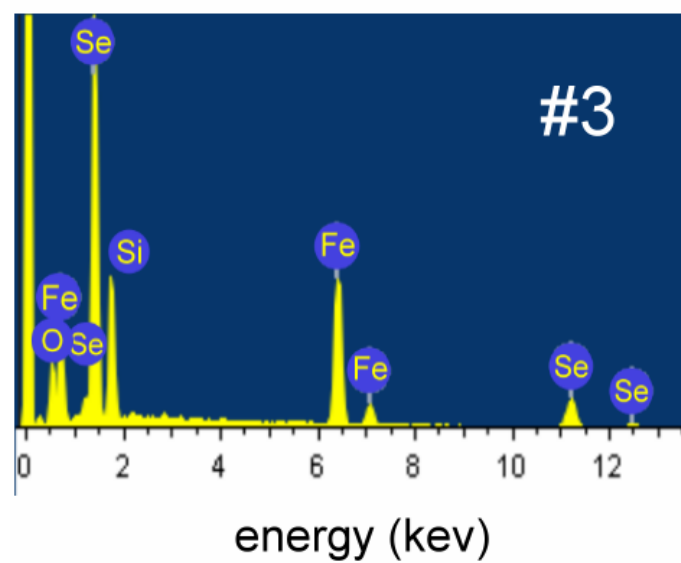

**Figure S2.** EDS for samples #1 (0.07g TDD), #2 (0.1g TDD), #3 (0.14g TDD) corresponding to Figure 6.
